# Supplementary material for: Distinct Cerebrospinal Fluid Proteomes Differentiate Post-Treatment Lyme Disease from Chronic Fatigue Syndrome
Source: PLOS journal article supplement (doi:10.1371/journal.pone.0017287), 2011-02-23
Supplement: S7 (10.1371/journal.pone.0017287.s007) [file journal.pone.0017287.s007]

**Table S5.** Pathway analysis for proteins identified only in *nPTLS* proteome.

| <b><u>Ingenuity Canonical Pathways</u></b>     | <b><u>-log(p-value)</u></b> |
|------------------------------------------------|-----------------------------|
| Glycine, Serine and Threonine Metabolism       | 3.46                        |
| Glioblastoma Multiforme Signaling              | 3.38                        |
| AMPK Signaling                                 | 3.25                        |
| Melatonin Signaling                            | 2.99                        |
| Molecular Mechanisms of Cancer                 | 2.60                        |
| p70S6K Signaling                               | 2.47                        |
| Factors Promoting Cardiogenesis in Vertebrates | 1.97                        |
| Ovarian Cancer Signaling                       | 1.89                        |
| Bile Acid Biosynthesis                         | 1.89                        |
| Regulation of eIF4 and p70S6K Signaling        | 1.87                        |
| Propanoate Metabolism                          | 1.86                        |
| Cardiac Hypertrophy Signaling                  | 1.80                        |
| Neuregulin Signaling                           | 1.76                        |
| Chemokine Signaling                            | 1.71                        |
| Inositol Phosphate Metabolism                  | 1.69                        |
| $\beta$ -alanine Metabolism                    | 1.68                        |
| mTOR Signaling                                 | 1.66                        |
| Thrombin Signaling                             | 1.58                        |
| PPAR $\alpha$ /RXR $\alpha$ Activation         | 1.57                        |
| Aldosterone Signaling in Epithelial Cells      | 1.53                        |
| GNRH Signaling                                 | 1.52                        |
| Aminoacyl-tRNA Biosynthesis                    | 1.51                        |
| Butanoate Metabolism                           | 1.42                        |
| Insulin Receptor Signaling                     | 1.38                        |
| Cellular Effects of Sildenafil (Viagra)        | 1.37                        |
| CCR3 Signaling in Eosinophils                  | 1.36                        |
| Role of NFAT in Cardiac Hypertrophy            | 1.35                        |
| Synthesis and Degradation of Ketone Bodies     | 1.32                        |
