# Supplementary material for: Distinct Cerebrospinal Fluid Proteomes Differentiate Post-Treatment Lyme Disease from Chronic Fatigue Syndrome
Source: PLOS journal article supplement (doi:10.1371/journal.pone.0017287), 2011-02-23
Supplement: S8 (10.1371/journal.pone.0017287.s008) [file journal.pone.0017287.s008]

**Table S6.** Pathways significantly enriched by proteins identified only in the pooled sample proteome for *CFS* patients.

| <b><u>Ingenuity Canonical Pathways</u></b>                            | <b><u>-log(p-value)</u></b> |
|-----------------------------------------------------------------------|-----------------------------|
| CDK5 Signaling                                                        | 4.06                        |
| Cardiac beta-adrenergic Signaling                                     | 3.40                        |
| Dopamine Receptor Signaling                                           | 3.30                        |
| Protein Kinase A Signaling                                            | 2.58                        |
| Relaxin Signaling                                                     | 2.21                        |
| Cellular Effects of Sildenafil (Viagra)                               | 2.07                        |
| Clathrin-mediated Endocytosis Signaling                               | 2.00                        |
| cAMP-mediated Signaling                                               | 2.00                        |
| Breast Cancer Regulation by Stathmin1                                 | 1.88                        |
| Sphingosine-1-phosphate Signaling                                     | 1.84                        |
| Hepatic Fibrosis / Hepatic Stellate Cell Activation                   | 1.70                        |
| ±-Adrenergic Signaling                                                | 1.68                        |
| Valine, Leucine and Isoleucine Degradation                            | 1.67                        |
| Production of Nitric Oxide and Reactive Oxygen Species in Macrophages | 1.66                        |
| IL-1 Signaling                                                        | 1.61                        |
| Leptin Signaling in Obesity                                           | 1.56                        |
| G-Protein Coupled Receptor Signaling                                  | 1.56                        |
| Role of NFAT in Cardiac Hypertrophy                                   | 1.56                        |
| ±12/13 Signaling                                                      | 1.52                        |
| Actin Cytoskeleton Signaling                                          | 1.47                        |
| IL-8 Signaling                                                        | 1.43                        |
| CREB Signaling in Neurons                                             | 1.43                        |
| Synaptic Long Term Potentiation                                       | 1.36                        |
| CXCR4 Signaling                                                       | 1.31                        |
